# Supplementary material
Source: Springer Nature journal article supplement (https://www.springermedizin.de/resource/supplementary/12943_2009_516_MOESM3_ESM.pdf/9554404)

**A**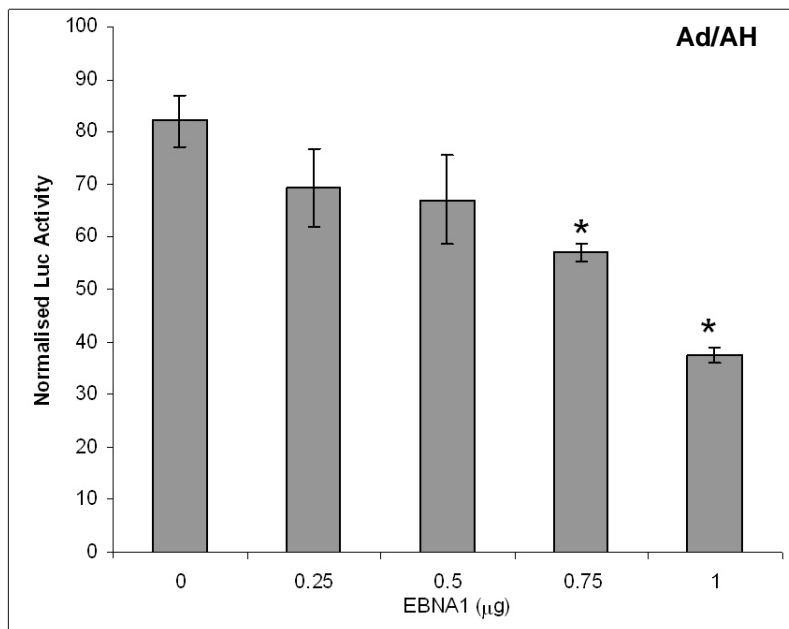**B**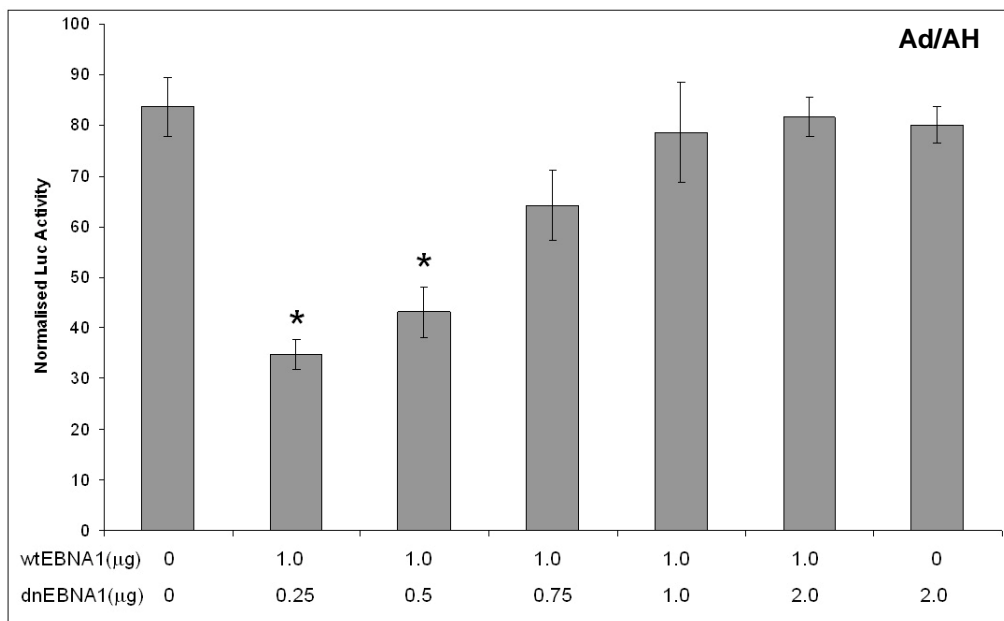

Supplement: MOESM3 [file 9554404]
